# Supplementary material
Source: publisher figshare collection journal article supplement (https://sage.figshare.com/ndownloader/files/23482644)
Supplement: Supplementary file 1 [file 23482644]

### Supplemental Material

**Correlations.** Table S1 summarizes correlations among variables included in Study 1. As hypothesized, our index of interests in international competitions was negatively associated with attitudes toward Southeast Asians,  $r = -.150$ ,  $p = .024$ , 95% CI [-.280, -.019]. In addition, attitudes toward Southeast Asians were negatively associated with age,  $r = -.171$ ,  $p = .010$ , 95% CI [-.301, -.041], and system justification,  $r = -.152$ ,  $p = .023$ , 95% CI [-.282, -.021]. We also note that older adults were more interested in international sports competitions,  $r = .134$ ,  $p = .044$ , 95% CI [.004, .265].

Table S1. Means, Standard Deviations, and Correlations among Variables

|                               | 1      | 2      | 3      | 4      | 5      | 6    |
|-------------------------------|--------|--------|--------|--------|--------|------|
| 1. International Competitions | -      |        |        |        |        |      |
| 2. Attitudes                  | -.150* | -      |        |        |        |      |
| 3. Age                        | .134*  | -.171* | -      |        |        |      |
| 4. Family Income              | .063   | -.067  | .181** | -      |        |      |
| 5. Subjective SES             | .039   | -.065  | .143*  | .486** | -      |      |
| 6. System Justification       | -.068  | -.152* | .167*  | .072   | .282** | -    |
| <i>M</i>                      | 0.51   | 4.59   | 39.63  | 4.39   | 4.87   | 3.23 |
| <i>SD</i>                     | 0.77   | 0.76   | 11.10  | 1.42   | 1.71   | 0.82 |

\*\*  $p < .01$  & \*  $p < .05$ .

## RESUME

### DEMOGRAPHICS

|                     |         |                                             |                  |
|---------------------|---------|---------------------------------------------|------------------|
| Name                |         | Phan Loan                                   |                  |
| Date of Birth (Age) |         | 11. 10. 1993 (25)                           | Gender<br>Female |
| Contact             | E-mail  | loan48611@gmail.com                         |                  |
|                     | Address | 35 Baekbeom-ro, Mapo-gu, Seoul 04107, Korea |                  |

### BACKGROUND

|                                |                                              |
|--------------------------------|----------------------------------------------|
| Work Experience<br>(Part Time) | English translator, English tutor            |
| Certificate                    | TOPIK (Test of Proficiency in Korean) II, L5 |

### STATEMENTS

|                                                                                                                                                                                                                                                                                                                                                                                                                                                                                                                                                                                                                                                                                                               |                                                                        |
|---------------------------------------------------------------------------------------------------------------------------------------------------------------------------------------------------------------------------------------------------------------------------------------------------------------------------------------------------------------------------------------------------------------------------------------------------------------------------------------------------------------------------------------------------------------------------------------------------------------------------------------------------------------------------------------------------------------|------------------------------------------------------------------------|
| Personal Strengths                                                                                                                                                                                                                                                                                                                                                                                                                                                                                                                                                                                                                                                                                            | I'm hard-working, detail-oriented, and have good interpersonal skills. |
| <p>Hello, I am Phan Loan, a college undergraduate majoring in English education. I would like to apply for a position opened at [company's name]. <i>I was born in Vietnam and moved to Korea when I was 8 years old. I spent the past 17 years in Korea and acquired Korean citizenship. Thus, I am very fluent in Korean.</i> I have had much working experience. Mostly, I have worked part time as an English translator and a tutor. To gain different types of knowledge and experiences, I would like to work at [company's name]. Also, I would be able to work for at least one year. Once hired, I will do my best and you will not be disappointed. Thank you for your time and consideration.</p> |                                                                        |

### AVAILABILITY

|                                                                    |
|--------------------------------------------------------------------|
| Day Willing to Work: 7 Days a week<br>When available to start: Now |
|--------------------------------------------------------------------|

**Note.** Part time application materials (Vietnamese applicant version). The only differences in the Korean and Canadian versions were that the names (“*Phan Loan*” was replaced with “Kim Areum” or “Emily Hill”) and email addresses. The *italic* sentences were included only in the Vietnamese and Canadian versions, and “*Vietnam*” was replaced with “*Canada*.”
